1 **QTL analysis of macrophages from an AKR/JxDBA/2J intercross identified the**  
2 ***Gpnmb* gene as a modifier of lysosome function**

3

4 Short title: *Gpnmb* modifies lysosome function

5

6 Peggy Robinet<sup>1,2</sup>, Brian Ritchey<sup>1</sup>, Alexander M. Alzayed<sup>1</sup>, Sophia DeGeorgia<sup>1</sup>, Eve  
7 Schodowski<sup>1</sup>, Shuhui Wang Lorkowski<sup>1</sup>, and Jonathan D. Smith<sup>1,2,\*</sup>

8 <sup>1</sup>, Department of Cardiovascular & Metabolic Sciences, Lerner Research Institute, Cleveland  
9 Clinic, Cleveland, OH, USA, 44195

10 <sup>2</sup>, Department of Molecular Medicine, Cleveland Clinic Lerner College of Medicine of Case  
11 Western Reserve University, Cleveland, OH, USA 44195

12 \*, Corresponding author, email: smithj4@ccf.org

13

## 14 **Abstract**

15 Our prior studies found differences in the AKR/J and DBA/2J strains in regard to  
16 atherosclerosis and macrophage phenotypes including cholesterol ester loading,  
17 cholesterol efflux, and autolysosome formation. The goal of this study was to determine  
18 if there were differences in macrophage lysosome function, and if so to use quantitative  
19 trait locus (QTL) analysis to identify the causal gene. Lysosome function was measured  
20 by incubation with an exogenous double-labeled ovalbumin indicator sensitive to  
21 proteolysis. DBA/2J vs. AKR/J bone marrow macrophages had significantly decreased  
22 lysosome function. Macrophages were cultured from 120 mice derived from an  
23 AKR/JxDBA/2J F<sub>4</sub> intercross. We measured lysosome function and performed a high  
24 density genome scan. QTL analysis yielded two genome wide significant loci on  
25 chromosomes 6 and 17, called macrophage lysosome function modifier (*Mlfm*) loci  
26 *Mlfm1* and *Mlfm2*. After adjusting for *Mlfm1*, two additional loci were identified. Based  
27 on proximity to the *Mlfm1* peak, macrophage mRNA expression differences with AKR/J  
28 >> DBA/2J, and a protein coding nonsense variant in DBA/2J, the *Gpnmb* gene,  
29 encoding a lysosomal membrane protein, was our top candidate. To test this candidate,  
30 *Gpnmb* expression was knocked down with siRNA in AKR/J macrophages; and, to  
31 express the wildtype *Gpnmb* in DBA/2J macrophages, we obtained a DBA/2J substrain,  
32 DBA/2J-Gpnmb+/SjJ, which was isolated from the parental strain prior to its acquiring  
33 the nonsense mutation, and subsequently back crossed to the modern DBA/2J  
34 background. Knockdown of *Gpnmb* in AKR/J macrophages decreased lysosome  
35 function, while restoration of the wildtype *Gpnmb* allele in DBA/2J macrophages  
36 increased lysosome function. However, this modifier of lysosome function was not

37 responsible for the strain differences in macrophage cholesterol ester loading or  
38 cholesterol efflux. In conclusion, we identified the *Gpnmb* gene as the major modifier of  
39 lysosome function and we showed that the ‘QTL in a dish’ strategy is efficient in  
40 identifying modifier genes.

## 41 **Author Summary**

42 Inbred strains of mice differ in both their genetic backgrounds as well as in many traits;  
43 and, classical mouse genetics allows the mapping of genes responsible for these traits.  
44 We identified many traits that differ between the inbred strains AKR/J and DBA/2J,  
45 including atherosclerosis susceptibility, macrophage cholesterol metabolism, and in the  
46 current study, macrophage protein degradation via an organelle called the lysosome.  
47 Using mouse genetic mapping and bioinformatics we identified a candidate gene, called  
48 *Gpnmb*, responsible for modifying lysosome function; and, the DBA/2J strain carries a  
49 mutation in this gene. Here we demonstrate that the *Gpnmb* gene is a modifier of  
50 lysosome function by either correcting this *Gpnmb* mutation in DBA/2J macrophages, or  
51 by knocking down *Gpnmb* expression in AKR/J macrophages. This study is noteworthy  
52 as the human *GNMB* gene has been implicated in many diseases including cancer,  
53 kidney injury, obesity, non-alcoholic steatohepatitis, Parkinson disease, osteoarthritis,  
54 and lysosome storage disorders.

## 55 Introduction

56 Atherosclerosis, the primary cause of cardiovascular disease and the leading cause of  
57 death worldwide[1], is characterized by the progressive buildup of cholesterol-rich  
58 plaques in the arteries. Atherosclerosis severity in various mouse models is modified by  
59 their genetic background[2]. On the apoE-deficient background, AKR/J mice have 10-  
60 fold smaller aortic root lesions than DBA/2J[2]. When bone marrow derived  
61 macrophages (BMDM) from these two strains are loaded with acetylated low density  
62 lipoprotein (AcLDL) in vitro, modeling cholesterol loaded foam cells, DBA/2J cells  
63 accumulate more cholesterol esters (CE) while AKR/J cells have higher free cholesterol  
64 (FC) levels leading to CE/FC ratio ~3-fold higher in DBA/2J macrophages[3]. Autophagy  
65 is the major pathway for lipid droplet clearance in these foam cells. This involves the  
66 engulfment of lipid droplets into autophagosomes, which fuse with lysosomes where CE  
67 is hydrolyzed to FC by lysosomal acid lipase. DBA/2J foam cells have delayed  
68 autolysosome formation resulting in an inefficient clearance of lipid droplet CE[3];  
69 whereas, autophagy initiation and autophagosome number is not different in AKR/J vs.  
70 DBA/2J foam cells[3]. We thus made the hypothesis that the lysosome arm of  
71 autophagy, rather than the autophagosome arm, was leading to the observed  
72 differences in cholesterol metabolism in AKR/J vs. DBA/2J macrophage foam cells.

73 Here, we applied a genetic instrument, quantitative trait locus (QTL) mapping, to  
74 identify genes that impact lysosome function in BMDM from an AKR/JxDBA/2J F<sub>4</sub> strain  
75 intercross. We discovered four macrophage lysosome function modifier (*Mlfm*) loci, with  
76 the strongest locus on the proximal region of chromosome 6 (*Mlfm1*). The gene  
77 encoding the Glycoprotein Non-Metastatic Protein B (*GpnmB*) was our top candidate

78 gene for the *Mlfn1* QTL due to its proximity to the LOD peak, expression difference and  
79 expression QTL (eQTL) in our strain pair[4, 5], and the presence of a nonsense  
80 mutation in the DBA/2J strain[6]. In the context of macrophages, the GPNMB protein  
81 has been shown to be associated with lysosome and autophagosome membranes[7-9].  
82 *Gpnmb* expression is increased in foam cells[4, 10], especially M2 polarized  
83 macrophages[11]. This GPNMB protein is also induced in lysosomal storage  
84 diseases[12]. We now describe our findings that the *Gpnmb* gene is responsible for the  
85 *Mlfn1* QTL. However, the effect of the *Gpnmb* gene on lysosome function did not  
86 translate to an effect on cholesterol ester loading or cholesterol efflux. Thus, we still  
87 have not discovered the gene responsible for decreased lysosome-autophagosome  
88 fusion in DBA/2J BMDM that can alter lipid droplet turnover.

## 89 **Results**

### 90 **DBA/2J vs. AKR/J BMDM have decreased lysosome function**

91 We assessed lysosome volume per cell by immunofluorescent staining of fixed cells  
92 with Lamp1 antibody and flow cytometry. DBA/2J vs. AKR/J BMDM had a 32%  
93 decrease in lysosome volume ( $p < 0.01$ , Figure 1A). In order to measure lysosome  
94 function in AKR/J and DBA/2J BMDM, we adopted a commercially available compound,  
95 DQ-ovalbumin. This product is taken up by cellular pinocytosis and accumulates in  
96 lysosomes, where proteolysis increases the fluorescence of the tightly-packed self-  
97 quenched Bodipy fluorophore[13]. We showed that cellular Bodipy fluorescence was  
98 blunted by pretreatment of the cells with lysosomal protease inhibitors E64d and  
99 pepstatin A, which also get into cells via pinocytosis (Figure 1B). As fluorescence

100 intensity would also be dependent upon the uptake of the label, we modified the DQ-  
101 ovalbumin by covalent modification with Alexa647 (A-DQ-ova), so that the  
102 Bodipy/Alexa647 fluorescence ratio would indicate proteolysis normalized for cellular  
103 uptake. We validated this doubly labeled A-DQ-ova by incubation with proteinase K,  
104 which showed robust increase in the Bodipy/Alexa647 fluorescence ratio (Figure 1C).  
105 We assessed lysosome function by flow cytometry and calculated the Bodipy/Alexa647  
106 fluorescence intensity ratio in 10,000 cells per line (Figure 1D). The median  
107 Bodipy/Alexa647 ratio was 45% higher in AKR/J vs. DBA/2J ( $p < 0.01$ , Figure 1E left  
108 panel), while the 95<sup>th</sup> percentile was 49% higher in AKR/J vs. DBA/2J ( $p < 0.001$ , Figure  
109 1E right panel); demonstrating decreased lysosome function in DBA/2J BMDM.

110 We then incubated cells with FITC-TAMRA-dextran to assess lysosomal pH by flow  
111 cytometry. Dextran is taken up by pinocytosis and accumulates in lysosomes. FITC  
112 fluorescence is pH dependent and is lower as pH decreases in acidic organelles such  
113 as lysosomes, while TAMRA fluorescence is pH insensitive. Thus, cellular FITC/TAMRA  
114 ratio is an indicator of lysosomal pH. We demonstrated that treatment of cells with  
115 Bafilomycin A1 led to a time dependent increase in the FITC/TAMRA ratio, indicating  
116 increased lysosomal pH (Figure 2A). We calculated FITC/TAMRA ratio in AKR/J vs.  
117 DBA/2J BMDM and found that the lysosomal pH was not statistically different (Figure  
118 2B, C), ruling out increased pH as the cause for lysosome dysfunction in DBA/2J  
119 macrophages.

## 120 **Significant QTL for lysosome function maps to chromosome 6**

121 We used a genetic approach to identify the gene region responsible for the strain  
122 difference in lysosome function. Lysosome function was measured using A-DQ-ova in

123 BMDM lines derived from 120 F<sub>4</sub> mice from an AKR/JxDBA/2J strain intercross, using  
124 the 95<sup>th</sup> percentile values, as these were more significant than the median values  
125 (Figure 1E). There was no significant effect of sex on this phenotype ( $p=0.61$ ), so we  
126 combined data from male and female macrophages. The data were normally distributed  
127 (Figure 3A) and were used to perform QTL mapping. We identified two macrophage  
128 lysosome function modifier (*Mlfm*) QTLs that we named *Mlfm1* and *Mlfm2* on the  
129 proximal regions of chromosomes 6 and 17, respectively (Figure 3B). *Mlfm1*, at 49.7 Mb  
130 on chromosome 6 (90% confidence interval 28.7 – 64.9 Mb), was the strongest locus  
131 with a LOD score of 6.09 (Table 1). We divided the 120 BMDM lines by their genotypes  
132 at *Mlfm1* and found a gene dosage effect with each DBA/2J allele decreasing lysosome  
133 function by 6% (Figure 3C, ANOVA linear trend test  $r^2=0.208$ ,  $p<0.0001$ ), indicating that  
134 this locus is associated with ~21% of the variance in lysosome function in the F<sub>4</sub> cohort.  
135 *Mlfm2* was located at 9.5 Mb on chromosome 17 (90% confidence interval 6.0 – 16.5  
136 Mb) with a LOD score of 4.28 (Table 1). We adjusted for the *Mlfm1* genotype as an  
137 additive co-variate and reran the QTL analysis (Figure 4). We identified new peaks on  
138 the distal sides of chromosomes 2 and 17 (*Mlfm3* LOD score 5.55 and *Mlfm4* LOD  
139 score 4.32, respectively) and confirmed *Mlfm2* on the proximal end of chromosome 17  
140 that was moderately strengthened (LOD score 4.61, Table 2).

141 Table 1. Significant lysosome function QTLs

| QTL name     | Chromosome | Peak Mb<br>(90% confidence interval) | Max LOD | Genome wide<br>p Value |
|--------------|------------|--------------------------------------|---------|------------------------|
| <i>Mlfm1</i> | 6          | 49.7 (28.7 – 64.9)                   | 6.09    | <0.05                  |
| <i>Mlfm2</i> | 17         | 9.5 (6.0 – 16.5)                     | 4.28    | <0.05                  |

142

143

144 Table 2. Significant lysosome function QTLs after adjusting for *Mlfm1*.

| QTL name     | Chromosome | Peak Mb<br>(90% confidence interval) | Max LOD | Genome wide<br>p Value |
|--------------|------------|--------------------------------------|---------|------------------------|
| <i>Mlfm2</i> | 17         | 9.6 (6.0 – 17.1)                     | 4.61    | <0.05                  |
| <i>Mlfm3</i> | 2          | 147.5 (111.2 – 158.1)                | 5.55    | <0.05                  |
| <i>Mlfm4</i> | 17         | 87.5 (79.4 – 89.1)                   | 4.32    | <0.05                  |

145

#### 146 Identification of *Gpnmb* as the gene responsible for the *Mlfm1* QTL

147 To limit the *Mlfm1* locus further we performed a Bayesian analysis which yielded an  
148 interval of 25.89 to 63.78 Mb, which contained 430 genes. Among them, *Gpnmb*,  
149 mapping at 48.99 Mb (0.17 Mb from the LOD peak), has a C>T mutation in DBA/2J  
150 mice leading to an early stop codon in exon 4[6]. This mutation is predicted to lead to  
151 non-sense mediated mRNA decay as traditionally defined[14]. We had previously  
152 observed a DBA/2J-AKR/J strain difference in BMDM *Gpnmb* mRNA levels in a  
153 microarray study with DBA/2J macrophages expressing ~12.5 fold less *Gpnmb*  
154 mRNA[4]. In a prior independent F<sub>2</sub> strain intercross we found a strong cis expression  
155 QTL (eQTL) for *Gpnmb* expression in BMDM with a LOD score of 22[5]. We performed  
156 a western blot for GPNMB protein in lysates from AKR/J and DBA/2J BMDM, and we  
157 did not detect any expression in DBA/2J macrophages (Figure 5A). Thus, we prioritized  
158 the *Gpnmb* gene as our top candidate at this locus. Fortunately, there exists a DBA/2  
159 substrain available at JAX that contains the wildtype *Gpnmb* gene, called DBA/2J-  
160 *Gpnmb*<sup>+</sup>/SjJ, which we will refer to as DBA/2g<sup>+</sup>[15]. Western blot confirmed GPNMB



161 protein expression in this line (Figure 5A). We used siRNA to knockdown *Gpnmb* in  
162 AKR/J BMDM, referred to as AKRg<sup>-</sup>, which decreased GPNMB protein expression  
163 robustly (Figure 5A).

164 Lysosome function was measured in AKR/J, AKRg<sup>-</sup>, DBA/2J and DBA/2g<sup>+</sup> BMDM  
165 using A-DQ-ova (Figure 5B). DBA/2J vs. AKR/J BMDM had a 27% decrease in  
166 lysosome function (p<0.001, by ANNOVA posttest). AKRg<sup>-</sup> vs. AKR/J had a 12%  
167 decrease in lysosome function (p<0.001). WT *Gpnmb* expression in DBA/2g<sup>+</sup> restored  
168 lysosome function to level similar than those observed in AKR/J BMDM (DBA/2g<sup>+</sup> vs.  
169 DBA/2J, 30% increase, p<0.001; DBA/2g<sup>+</sup> vs. AKR/J, not significant). These data  
170 confirm *Gpnmb* as a causal gene at the *Mlfn1* locus, the strongest locus associated  
171 with lysosome function.

## 172 ***Gpnmb* expression does not alter macrophage cholesterol loading or efflux.**

173 We tested to see if *Gpnmb* genotype altered cholesterol loading and efflux. The 4  
174 genotypes of BMDM were loaded with 50 µg/mL AcLDL for 24h. Total cholesterol levels  
175 were not significantly different, but as we had previously observed[3, 16], AKR/J cells  
176 accumulated more free cholesterol and DBA/2J cells accumulated more cholesterol  
177 esters (Figure 6 A-C). However, *Gpnmb* gene status had no effect on cholesterol  
178 loading, only strain effects were significant. [<sup>3</sup>H]Cholesterol labeled loaded BMDM were  
179 allowed to efflux cholesterol for 4h to 10 µg/mL lipid-free apoA1. Again, *Gpnmb* gene  
180 status did not alter efflux, only the strain effect was significant as previously  
181 described[3].

## 182 **Discussion**

183 We previously crossed apoE-deficiency onto six inbred strains, DBA/2J, C57BL/6J,  
184 129/SV-ter, AKR/J, BALB/cByJ, and C3H/HeJ; and, among these strains the DBA/2J  
185 has the largest aortic root atherosclerotic lesions, while AKR/J was one of several  
186 strains with small lesions[2]. This led us to follow up with two independent strain  
187 intercrosses to identify atherosclerosis modifier genes using the DBA/2J and AKR/J  
188 parental strains, which identified three confirmed atherosclerosis QTLs, *Ath22*, *Ath26*,  
189 and *Ath28*[5, 17]. Since macrophages are a key cell type in atherogenesis, we also  
190 performed eQTL analysis of BMDM from these same two independent AKR/JxDBA/2J  
191 strain intercrosses in order to gain insights into potential atherosclerosis modifier  
192 candidate genes[5, 18]. We also started series of studies to explore BMDM phenotypes  
193 from these two parental strains. Thus far we found significant strain effects on  
194 cholesterol ester loading, cholesterol efflux to apolipoprotein AI or HDL acceptors,  
195 autolysosome formation, and, in the present study, lysosome function. To identify QTL  
196 loci for these traits, we bred an F<sub>4</sub> strain intercross and froze down aliquots of bone  
197 marrow for subsequent phenotype studies. We recently reported the first of these QTL  
198 studies, which identified an AKR/J deletion in exon 2 of the *Soat1* gene, encoding acyl-  
199 CoA:cholesterol acyl transferase 1, also known as ACAT1, as the strongest locus  
200 modifying cholesterol ester loading[16].

201 The DBA/2J and AKR/J inbred strains have been useful in many areas of mouse  
202 physiology and disease. For example, the DBA/2J strain is susceptible to epicardiac  
203 calcification, which was mapped to the *Dyscalc1* QTL; and, the causal gene was  
204 identified *Abcc6* gene which has undetectable expression in the DBA/2J strain[19].  
205 Another feature of the DBA/2J strain is that ~70% of these mice develop glaucoma by

206 12 months of age, after iris pigment dispersion (*ipd*) and iris stromal atrophy (*isa*)[15].  
207 In a DBA/2JxC57BL/6J strain intercross, the *ipd* and *isa* phenotypes segregated to the  
208 *ipd* locus on chromosome 6 and the *isa* locus on chromosome 4[20]. Subsequent  
209 DBA/2JxC57BL/6J intercrosses fine mapped the *ipd* locus, and led to the discovery that  
210 this phenotype was due to a nonsense mutation in the *Gpnmb* gene (*Gpnmb*<sup>R150X</sup>) in the  
211 DBA/2J strain[6]. Furthermore, DBA/2 substrains with the wildtype *Gpnmb* gene do not  
212 have the *ipd* phenotype[6]. Thus, the same DBA/2J *Gpnmb* nonsense allele responsible  
213 for decreased macrophage lysosome function in our study is responsible for the *ipd*  
214 phenotype in the eye. *Gpnmb* encodes for Glycoprotein Non-Metastatic Protein B  
215 (GPNMB) which was originally discovered in a melanoma cell line[21]. This protein, also  
216 called osteoactivin, DC-HIL, or hematopoietic growth factor inducible neurokinin-1, has  
217 been studied extensively in many contexts including cancer, kidney injury, obesity, non-  
218 alcoholic steatohepatitis, Parkinson disease, osteoarthritis, lysosome storage disorders,  
219 and heart failure; and, in most of these contexts expression of GPNMB is induced by  
220 the related pathology, likely in response to lysosomal stress[12, 22-27]. However, loss  
221 of *Gpnmb* expression in DBA/2J mice is associated with preserved cardiac function  
222 after myocardial infarction[28]. Thus, there is much interest in *Gpnmb* and the role it  
223 plays in a multitude of diseases and in normal physiology.

224 In the current study, we verified that the *Gpnmb* null allele in the DBA/2J strain was  
225 responsible for the *Mlfr1* QTL on chromosome 6, the strongest locus for macrophage  
226 lysosome function. In addition to the *Mlfr1* QTL, we identified 3 other *Mlfr* loci on the  
227 distal region of chromosome 2 (*Mlfr3*) and on the proximal and distal regions of  
228 chromosome 17 (*Mlfr2* and *Mlfr4*). Further study will be needed to elucidate these

229 genes and determine if any of these can account for the decreased autolysosome  
230 formation and lipid droplet turnover observed in DBA/2J macrophages.

231 We were able to identify the causal gene for the *Mlfr1* QTL without laborious  
232 breeding of congenic strains for fine mapping. This was aided by several factors  
233 including the use of an F<sub>4</sub> intercross cohort leading to more recombinations per  
234 chromosome and by performing a high density genome scan leading to precision QTL  
235 mapping. Another fortuitous factor was the availability of the DBA/2 substrain  
236 expressing wildtype *Gpmb*. In our experience several phenotype assays performed in  
237 mice have high coefficients of variation. For example, fatty streak aortic root lesion  
238 areas in 16 week old chow diet-fed apoE-deficient mice on inbred background strains  
239 often yield coefficients of variation approaching 50%. This large phenotypic variation,  
240 due to either stochastic or subtle environmental differences, leads to less power to  
241 detect QTLs. In the current study, we used ex-vivo cell based assays, which had  
242 smaller coefficients of variation of ~10%, leading to better power for QTL analysis even  
243 with a smaller sample size compared to many mouse based QTL studies. We call this  
244 ex vivo cell based approach ‘QTL in a dish’. One advantage of this method is the ability  
245 to treat cells with compounds or conditions that would be difficult to perform or painful in  
246 live mice. The related method ‘GWAS in a dish’ is being used to study phenotypes in  
247 different tissues derived from the differentiation of human induced pluripotent stem cells  
248 originating from cohorts consisting of ~ 100 to 200 subjects[29-31].

## 249 **Materials and Methods**

250 **Mouse strains.** AKR/J, DBA/2J, and DBA/2J-Gpnmb<sup>+</sup>/SjJ (stock # 007048) mice were  
251 obtained from JAX. The DBA/2J-Gpnmb<sup>+</sup>/SjJ mice were from the DBA/2 *Sandy*  
252 substrain, which was separated from the main DBA/2J line in the early 1980s, before  
253 the *Gpnmb*<sup>R150X</sup> null allele was fixed in the DBA/2J stock. Modern backcrossing to  
254 DBA/2J mice was performed to maintain the wildtype *Gpnmb* (g<sup>+</sup>) allele on the DBA/2J  
255 background[15]. All mouse studies were approved by the Cleveland Clinic Animal Care  
256 and Use Committee.

257 **Generation and genotyping of AKR/JxDBA/2J F<sub>4</sub> mice.** Parental male AKR/J and  
258 female DBA/2J mice were crossed to generate the F<sub>1</sub> generation, fixing the Y  
259 chromosome from the AKR/J strain. Two breeding pairs of F<sub>1</sub> mice were bred to  
260 generate the F<sub>2</sub> mice, and two breeding pairs of F<sub>2</sub> mice were used to generate F<sub>3</sub> mice.  
261 Six breeding pairs of F<sub>3</sub> mice were used to generate the 122 F<sub>4</sub> mice, which consisted of  
262 70 males and 52 females[16]. Healthy F<sub>4</sub> mice were sacrificed at 8-10 weeks of age.  
263 Ear tissue was collected from each mouse and digested overnight at 55°C in lysis buffer  
264 containing 20 mg/mL proteinase K. DNA was ethanol precipitated and resuspended in  
265 10 mM Tris 1 mM EDTA (pH=8). Femurs were promptly flushed after sacrifice, and  
266 bone marrow cells were washed, aliquoted, and cryopreserved. Cells were thawed and  
267 differentiated into macrophages at the time of experimentation, as described below. F<sub>4</sub>  
268 mice were genotyped as described previously[16]. Briefly, the GeneSeek MegaMUGA  
269 SNP array was used, and filtering for call frequency and strain polymorphism using  
270 parental and F<sub>1</sub> DNA yielded 16,975 informative SNPs that were used for QTL analysis.  
271 All marker locations are based on NCBI Mouse Genome Build 37.

272 **Bone marrow macrophages.** Bone marrow derived macrophages were obtained from  
273 F<sub>4</sub> mice and female mice on the AKR/J, DBA/2J and DBA/2g<sup>+</sup> background. Bone  
274 marrow cells were suspended in macrophage growth medium (DMEM, 10% FBS, 20%  
275 L-cells conditioned media as a source of MSCF) as previously described[32, 33] and  
276 plated in tissue culture coated 6, 12, or 24 well plates. The media was renewed twice  
277 per week. Cells were used for experiments 10 to 14 days after plating when the bone  
278 marrow cells were confluent and fully differentiated into macrophages. When required,  
279 AKR/J cells were transfected with 50 nM silencer-select *Gpnmb* (4390771,  
280 Thermofisher Scientific) or control (4390843, Thermofisher Scientific) siRNA using  
281 TransIT-TKO (MIR2150, Mirus) as described by the manufacturer. Cells were incubated  
282 with the siRNA complexes for 48h, media was then replaced with fresh macrophage  
283 growth media (in the presence or absence of 50 µg/ml AcLDL as indicated), and  
284 incubated for another 24h before experiments.

285 **Lipoprotein preparations.** Human LDL (1.019 < d < 1.063 g/mL) were prepared by  
286 ultracentrifugation from de-identified expired blood bank human plasma (exempt from  
287 human research rules as determined by the Cleveland Clinic Institutional Review  
288 Board). LDL was acetylated as described previously[34, 35] and dialyzed against PBS  
289 with 100 µM EDTA and 20 µM BHT. Protein concentrations of lipoproteins were  
290 determined using an alkaline Lowry assay[36]. When indicated, cells were loaded with  
291 50 µg/mL of AcLDL for 24h.

292 **Lysosome assays.** In order to determine lysosome volume, live cells were first stained  
293 with LIVE/DEAD Fixable Blue Dead Cell Stain (L23105, Thermofisher Scientific), to gate  
294 on live cells. The cells were fixed in 4% paraformaldehyde and permeabilized with

295 saponin and lysosomes were labeled using 10  $\mu\text{g}/\text{mL}$  dilution of FITC-labeled antibody  
296 against mouse Lamp-1 (ab24871, abcam), a lysosomal structural protein. To validate  
297 the use of DQ-ovalbumin as a surrogate measure of lysosome function, cells were pre-  
298 treated for 3h in absence or presence of 10  $\mu\text{g}/\text{mL}$  E64d (E8640, Sigma-Aldrich) and 10  
299  $\mu\text{g}/\text{mL}$  pepstatin A (P5318, Sigma-Aldrich) before incubating for 30 min with the  
300 reagent. To measure lysosome function, macrophages were labeled with alexa647  
301 labeled DQ-ovalbumin (A-DQ-ova). This was prepared using 1 mg of DQ-ovalbumin  
302 (D12053, Thermofisher Scientific) in 0.1 M sodium bicarbonate that was incubated with  
303 98  $\mu\text{g}$  of Alexa Fluor 647 succinimidyl ester (A20006, Thermofisher Scientific) for 1h at  
304 room temperature (3:1 dye:protein mole ratio). The reaction was stopped by incubating  
305 the conjugate with 0.1 mL of 1.5 M hydroxylamine (pH 8.5) for 1h at room temperature.  
306 The conjugate was purified by extensive dialysis. Macrophages were incubated with 2  
307  $\mu\text{g}/\text{mL}$  of A-DQ-ova for 1h, washed with PBS and suspended using CellStripper  
308 (25056Cl, Corning). To evaluate lysosomal pH, cells were incubated for 18h with 1  
309 mg/mL FITC-TAMRA dextran (D1951, Thermofisher Scientific) followed by a 4h chase  
310 period in absence or presence of 10  $\mu\text{M}$  Bafilomycin A1 (B1793, Sigma-Aldrich) for the  
311 indicated times. In all experiments, 10,000 cells were analyzed by flow cytometry with a  
312 LSRII device (BD) using the following lasers and filters: 488nm excitation and 515/20nm  
313 emission (FITC and Bodipy), 639nm excitation and 660/20nm emission (Alexa647) and  
314 532nm excitation and 575/26nm emission (TAMRA). Flowjo software was used to  
315 export data for each cell for ratiometric analyses.

316 **Western blot.** AKR/J, AKRg<sup>-</sup>, DBA/2J and DBA/2g<sup>+</sup> macrophages were lyzed in RIPA  
317 buffer and equal protein levels loaded on 4-20% tris-glycine gels. After transfer,

318 membranes were probed with antibodies against GPNMB (AF2330, R&D Systems) and  
319 GAPDH (FL-335, Santa Cruz).

320 **Quantitative Trait Loci (QTL) analysis.** QTL mapping of macrophage lysosome  
321 function (*Mlfn*) from 120 out of 122 AKR/JxDBA/2J F<sub>4</sub> BMDMs (the other 2 lines did not  
322 yield viable cells) was performed using R/qtl software, with the final genotype and  
323 phenotype data formatted for analysis in the Data Supplement S1 Table[37]. The  
324 “scanone” function was utilized using Haley-Knott regression by specifying the “method”  
325 argument as “hk”. Genome-wide p-values were ascertained via permutation analysis,  
326 using 10,000 permutations by specifying the “n.perm” argument in the “scanone”  
327 function. QTL 90% confidence intervals were calculated using the 1-LOD drop off  
328 method. The credible interval for the *Mlfn1* locus was also determined by using the  
329 Bayesian credible interval (“bayesint”) function in R/qtl, with the “prob” argument set at  
330 0.95. Since *Mlfn1* had a significantly higher peak LOD score than any other locus, QTL  
331 mapping was performed using the genotype from the best associated *Mlfn1* marker as  
332 an additive covariate (“addcovar”) in the “scanone” function of R/qtl. The *Mlfn1*  
333 corrected data were subjected to 10,000 permutation analyses to determine genome-  
334 wide p-values. To aid in prioritizing candidate genes, a custom R function termed  
335 “flank\_LOD” was written (<http://www.github.com/BrianRitchey/qtl>). This “flank\_LOD”  
336 function utilizes the “find.flanking” function in R/qtl and returns the LOD score of the  
337 nearest flanking marker for a given candidate gene position based on “scanone” output  
338 data. Genes in a QTL interval were determined by custom written R functions  
339 (“QTL\_gene” and “QTL\_summary”) which utilized publicly available BioMart data from  
340 Mouse Genome Build 37. A custom written R function (“pubmed\_count”) which utilized



341 the rentrez package in R was used to determine the number of PubMed hits for Boolean  
342 searches of gene name and terms of interest. Custom written R functions  
343 (“sanger\_AKRvDBA\_missense\_genes” and “missense\_for\_provean”) were used to  
344 determine the number of non-synonymous mutations between AKR/J and DBA/2J in  
345 QTLs, as documented by the Wellcome Trust Sanger Institute’s Query SNP webpage  
346 for NCBIIm37 ([https://www.sanger.ac.uk/sanger/Mouse\\_SnpViewer/rel-1211](https://www.sanger.ac.uk/sanger/Mouse_SnpViewer/rel-1211)). Custom  
347 written VBA subroutines (“Provean\_IDs” and “Navigate\_to\_PROVEAN”) were used to  
348 automate PROVEAN software ([http://provean.jcvi.org/seq\\_submit.php](http://provean.jcvi.org/seq_submit.php)) queries for  
349 functional effects of missense mutations in each QTL, with rentrez functions utilized to  
350 retrieve dbSNP and protein sequence data. Ultimately, custom R code was used to  
351 generate output tables. Deleterious mutations were designated as defined by  
352 PROVEAN parameters[38]. Custom code can be found at  
353 <http://www.github.com/BrianRitchey/qtl>.

354 ***Other statistics.*** Large data sets were tested for normal distributions and passed, thus  
355 parametric statistics were used. Comparison of two conditions was performed by two-  
356 tailed student t-test, and comparison of multiple conditions was performed by ANOVA  
357 with Tukey or linear trend posttest. All data are shown as mean  $\pm$  S.D. Statistics were  
358 performed using GraphPad Prism software.

359

## 360 **References**

- 361 1. W.H.O. Cardiovascular Diseases (CVDs). Fact Sheet. 2017.
- 362 2. Smith JD, James D, Dansky HM, Wittkowski KM, Moore KJ, Breslow JL. In silico  
363 quantitative trait locus map for atherosclerosis susceptibility in apolipoprotein E-deficient mice.  
364 *Arterioscler Thromb Vasc Biol.* 2003;23(1):117-22. Epub 2003/01/14. PubMed PMID: 12524234.
- 365 3. Robinet P, Ritchey B, Smith JD. Physiological difference in autophagic flux in  
366 macrophages from 2 mouse strains regulates cholesterol ester metabolism. *Arterioscler Thromb*  
367 *Vasc Biol.* 2013;33(5):903-10. Epub 2013/03/16. doi: 10.1161/ATVBAHA.112.301041. PubMed  
368 PMID: 23493286; PubMed Central PMCID: PMC3646371.
- 369 4. Berisha SZ, Hsu J, Robinet P, Smith JD. Transcriptome analysis of genes regulated by  
370 cholesterol loading in two strains of mouse macrophages associates lysosome pathway and ER  
371 stress response with atherosclerosis susceptibility. *PLoS One.* 2013;8(5):e65003. Epub  
372 2013/05/25. doi: 10.1371/journal.pone.0065003. PubMed PMID: 23705026; PubMed Central  
373 PMCID: PMC3660362.
- 374 5. Hsu J, Smith JD. Genetic-genomic replication to identify candidate mouse  
375 atherosclerosis modifier genes. *J Am Heart Assoc.* 2013;2(1):e005421. Epub 2013/03/26. doi:  
376 10.1161/JAHA.112.005421. PubMed PMID: 23525445; PubMed Central PMCID:  
377 PMC3603265.
- 378 6. Anderson MG, Smith RS, Hawes NL, Zabaleta A, Chang B, Wiggs JL, et al. Mutations in  
379 genes encoding melanosomal proteins cause pigmentary glaucoma in DBA/2J mice. *Nat Genet.*  
380 2002;30(1):81-5. Epub 2001/12/18. doi: 10.1038/ng794. PubMed PMID: 11743578.
- 381 7. Ripoll VM, Meadows NA, Raggatt LJ, Chang MK, Pettit AR, Cassady AI, et al.  
382 Microphthalmia transcription factor regulates the expression of the novel osteoclast factor  
383 GPNMB. *Gene.* 2008;413(1-2):32-41. Epub 2008/03/04. doi: 10.1016/j.gene.2008.01.014.  
384 PubMed PMID: 18313864.

- 385 8. Ripoll VM, Irvine KM, Ravasi T, Sweet MJ, Hume DA. Gpnmb is induced in  
386 macrophages by IFN-gamma and lipopolysaccharide and acts as a feedback regulator of  
387 proinflammatory responses. *J Immunol.* 2007;178(10):6557-66. Epub 2007/05/04. PubMed  
388 PMID: 17475886.
- 389 9. Li B, Castano AP, Hudson TE, Nowlin BT, Lin SL, Bonventre JV, et al. The melanoma-  
390 associated transmembrane glycoprotein Gpnmb controls trafficking of cellular debris for  
391 degradation and is essential for tissue repair. *FASEB J.* 2010;24(12):4767-81. Epub  
392 2010/08/17. doi: 10.1096/fj.10-154757. PubMed PMID: 20709912; PubMed Central PMCID:  
393 PMCPMC2992370.
- 394 10. Marques AR, Gabriel TL, Aten J, van Roomen CP, Ottenhoff R, Claessen N, et al.  
395 Gpnmb Is a Potential Marker for the Visceral Pathology in Niemann-Pick Type C Disease. *PLoS*  
396 *One.* 2016;11(1):e0147208. Epub 2016/01/16. doi: 10.1371/journal.pone.0147208. PubMed  
397 PMID: 26771826; PubMed Central PMCID: PMCPMC4714856.
- 398 11. Yu B, Sondag GR, Malcuit C, Kim MH, Safadi FF. Macrophage-Associated  
399 Osteoactivin/GPNMB Mediates Mesenchymal Stem Cell Survival, Proliferation, and Migration  
400 Via a CD44-Dependent Mechanism. *J Cell Biochem.* 2016;117(7):1511-21. Epub 2015/10/08.  
401 doi: 10.1002/jcb.25394. PubMed PMID: 26442636.
- 402 12. van der Lienden MJC, Gaspar P, Boot R, Aerts J, van Eijk M. Glycoprotein Non-  
403 Metastatic Protein B: An Emerging Biomarker for Lysosomal Dysfunction in Macrophages. *Int J*  
404 *Mol Sci.* 2018;20(1). Epub 2018/12/28. doi: 10.3390/ijms20010066. PubMed PMID: 30586924;  
405 PubMed Central PMCID: PMCPMC6337583.
- 406 13. Emanuel R, Sergin I, Bhattacharya S, Turner J, Epelman S, Settembre C, et al.  
407 Induction of lysosomal biogenesis in atherosclerotic macrophages can rescue lipid-induced  
408 lysosomal dysfunction and downstream sequelae. *Arterioscler Thromb Vasc Biol.*  
409 2014;34(9):1942-52. Epub 2014/07/26. doi: 10.1161/ATVBAHA.114.303342. PubMed PMID:  
410 25060788; PubMed Central PMCID: PMCPMC4140993.

- 411 14. Maquat LE. Nonsense-mediated mRNA decay: splicing, translation and mRNP  
412 dynamics. *Nat Rev Mol Cell Biol.* 2004;5(2):89-99. Epub 2004/03/26. doi: 10.1038/nrm1310.  
413 PubMed PMID: 15040442.
- 414 15. Howell GR, Libby RT, Marchant JK, Wilson LA, Cosma IM, Smith RS, et al. Absence of  
415 glaucoma in DBA/2J mice homozygous for wild-type versions of *Gpnmb* and *Tyrp1*. *BMC*  
416 *Genet.* 2007;8:45. Epub 2007/07/05. doi: 10.1186/1471-2156-8-45. PubMed PMID: 17608931;  
417 PubMed Central PMCID: PMCPMC1937007.
- 418 16. Hai Q, Ritchey B, Robinet P, Alzayed AM, Brubaker G, Zhang J, et al. Quantitative Trait  
419 Locus Mapping of Macrophage Cholesterol Metabolism and CRISPR/Cas9 Editing Implicate an  
420 *ACAT1* Truncation as a Causal Modifier Variant. *Arterioscler Thromb Vasc Biol.* 2018;38(1):83-  
421 91. Epub 2017/11/04. doi: 10.1161/ATVBAHA.117.310173. PubMed PMID: 29097366; PubMed  
422 Central PMCID: PMCPMC5746475.
- 423 17. Smith JD, Bhasin JM, Baglione J, Settle M, Xu Y, Barnard J. Atherosclerosis  
424 susceptibility loci identified from a strain intercross of apolipoprotein E-deficient mice via a high-  
425 density genome scan. *Arterioscler Thromb Vasc Biol.* 2006;26(3):597-603. Epub 2005/12/24.  
426 doi: 10.1161/01.ATV.0000201044.33220.5c. PubMed PMID: 16373612.
- 427 18. Bhasin JM, Chakrabarti E, Peng DQ, Kulkarni A, Chen X, Smith JD. Sex specific gene  
428 regulation and expression QTLs in mouse macrophages from a strain intercross. *PLoS One.*  
429 2008;3(1):e1435. Epub 2008/01/17. doi: 10.1371/journal.pone.0001435. PubMed PMID:  
430 18197246; PubMed Central PMCID: PMCPMC2174529.
- 431 19. Meng H, Vera I, Che N, Wang X, Wang SS, Ingram-Drake L, et al. Identification of  
432 *Abcc6* as the major causal gene for dystrophic cardiac calcification in mice through integrative  
433 genomics. *Proc Natl Acad Sci U S A.* 2007;104(11):4530-5. Epub 2007/03/16. doi:  
434 10.1073/pnas.0607620104. PubMed PMID: 17360558; PubMed Central PMCID:  
435 PMCPMC1838635.

- 436 20. Chang B, Smith RS, Hawes NL, Anderson MG, Zabaleta A, Savinova O, et al.  
437 Interacting loci cause severe iris atrophy and glaucoma in DBA/2J mice. *Nat Genet.*  
438 1999;21(4):405-9. Epub 1999/04/07. doi: 10.1038/7741. PubMed PMID: 10192392.
- 439 21. Weterman MA, Ajubi N, van Dinter IM, Degen WG, van Muijen GN, Ruitter DJ, et al.  
440 nmb, a novel gene, is expressed in low-metastatic human melanoma cell lines and xenografts.  
441 *Int J Cancer.* 1995;60(1):73-81. PubMed PMID: 7814155.
- 442 22. Katayama A, Nakatsuka A, Eguchi J, Murakami K, Teshigawara S, Kanzaki M, et al.  
443 Beneficial impact of Gpnmb and its significance as a biomarker in nonalcoholic steatohepatitis.  
444 *Sci Rep.* 2015;5:16920. Epub 2015/11/20. doi: 10.1038/srep16920. PubMed PMID: 26581806;  
445 PubMed Central PMCID: PMC4652285.
- 446 23. Lin LY, Chun Chang S, O'Hearn J, Hui ST, Seldin M, Gupta P, et al. Systems Genetics  
447 Approach to Biomarker Discovery: GPNMB and Heart Failure in Mice and Humans. *G3*  
448 (Bethesda). 2018;8(11):3499-506. Epub 2018/09/12. doi: 10.1534/g3.118.200655. PubMed  
449 PMID: 30201759; PubMed Central PMCID: PMC6222577.
- 450 24. Maric G, Rose AA, Annis MG, Siegel PM. Glycoprotein non-metastatic b (GPNMB): A  
451 metastatic mediator and emerging therapeutic target in cancer. *Onco Targets Ther.* 2013;6:839-  
452 52. Epub 2013/07/23. doi: 10.2147/OTT.S44906. PubMed PMID: 23874106; PubMed Central  
453 PMCID: PMC3711880.
- 454 25. Moloney EB, Moskites A, Ferrari EJ, Isacson O, Hallett PJ. The glycoprotein GPNMB is  
455 selectively elevated in the substantia nigra of Parkinson's disease patients and increases after  
456 lysosomal stress. *Neurobiol Dis.* 2018;120:1-11. Epub 2018/08/28. doi:  
457 10.1016/j.nbd.2018.08.013. PubMed PMID: 30149180.
- 458 26. Patel-Chamberlin M, Wang Y, Satirapoj B, Phillips LM, Nast CC, Dai T, et al.  
459 Hematopoietic growth factor inducible neurokinin-1 (Gpnmb/Osteoactivin) is a biomarker of  
460 progressive renal injury across species. *Kidney Int.* 2011;79(10):1138-48. Epub 2011/03/11. doi:  
461 10.1038/ki.2011.28. PubMed PMID: 21389974.

- 462 27. Singh M, Del Carpio-Cano F, Belcher JY, Crawford K, Frara N, Owen TA, et al.  
463 Functional roles of osteoactivin in normal and disease processes. *Crit Rev Eukaryot Gene Expr.*  
464 2010;20(4):341-57. Epub 2010/01/01. PubMed PMID: 21395506.
- 465 28. Jarve A, Muhlstedt S, Qadri F, Nickl B, Schulz H, Hubner N, et al. Adverse left  
466 ventricular remodeling by glycoprotein nonmetastatic melanoma protein B in myocardial  
467 infarction. *FASEB J.* 2017;31(2):556-68. Epub 2017/02/06. doi: 10.1096/fj.201600613R.  
468 PubMed PMID: 28148779.
- 469 29. DeBoever C, Li H, Jakubosky D, Benaglio P, Reyna J, Olson KM, et al. Large-Scale  
470 Profiling Reveals the Influence of Genetic Variation on Gene Expression in Human Induced  
471 Pluripotent Stem Cells. *Cell Stem Cell.* 2017;20(4):533-46 e7. Epub 2017/04/08. doi:  
472 10.1016/j.stem.2017.03.009. PubMed PMID: 28388430; PubMed Central PMCID:  
473 PMCPMC5444918.
- 474 30. Warren CR, Cowan CA. Humanity in a Dish: Population Genetics with iPSCs. *Trends*  
475 *Cell Biol.* 2018;28(1):46-57. Epub 2017/10/22. doi: 10.1016/j.tcb.2017.09.006. PubMed PMID:  
476 29054332.
- 477 31. Warren CR, O'Sullivan JF, Friesen M, Becker CE, Zhang X, Liu P, et al. Induced  
478 Pluripotent Stem Cell Differentiation Enables Functional Validation of GWAS Variants in  
479 Metabolic Disease. *Cell Stem Cell.* 2017;20(4):547-57 e7. Epub 2017/04/08. doi:  
480 10.1016/j.stem.2017.01.010. PubMed PMID: 28388431.
- 481 32. Knight KR, Vairo G, Hamilton JA. Regulation of pinocytosis in murine macrophages by  
482 colony-stimulating factors and other agents. *J Leukoc Biol.* 1992;51(4):350-9. PubMed PMID:  
483 1314279.
- 484 33. Austin PE, McCulloch EA, Till JE. Characterization of the factor in L-cell conditioned  
485 medium capable of stimulating colony formation by mouse marrow cells in culture. *J Cell*  
486 *Physiol.* 1971;77(2):121-34. doi: 10.1002/jcp.1040770202. PubMed PMID: 5572424.

- 487 34. Fraenkel-Conrat H. Methods for investigating the essential group for enzyme activity.  
488 Methods in Enzymology. 1957;4:247-69.
- 489 35. Basu SK, Goldstein JL, Anderson GW, Brown MS. Degradation of cationized low density  
490 lipoprotein and regulation of cholesterol metabolism in homozygous familial  
491 hypercholesterolemia fibroblasts. Proc Natl Acad Sci U S A. 1976;73(9):3178-82. PubMed  
492 PMID: 184464; PubMed Central PMCID: PMC430973.
- 493 36. Markwell MA, Haas SM, Bieber LL, Tolbert NE. A modification of the Lowry procedure to  
494 simplify protein determination in membrane and lipoprotein samples. Anal Biochem.  
495 1978;87(1):206-10. PubMed PMID: 98070.
- 496 37. Broman KW, Wu H, Sen S, Churchill GA. R/qtI: QTL mapping in experimental crosses.  
497 Bioinformatics. 2003;19(7):889-90. PubMed PMID: 12724300.
- 498 38. Choi Y, Chan AP. PROVEAN web server: a tool to predict the functional effect of amino  
499 acid substitutions and indels. Bioinformatics. 2015;31(16):2745-7. doi:  
500 10.1093/bioinformatics/btv195. PubMed PMID: 25851949; PubMed Central PMCID:  
501 PMC4528627.

502

503 **Supporting information captions**

504 S1 Table. Lysosome function phenotypes and genotypes formatted for r/QTL analysis.

505



506 **Figures and Legends**

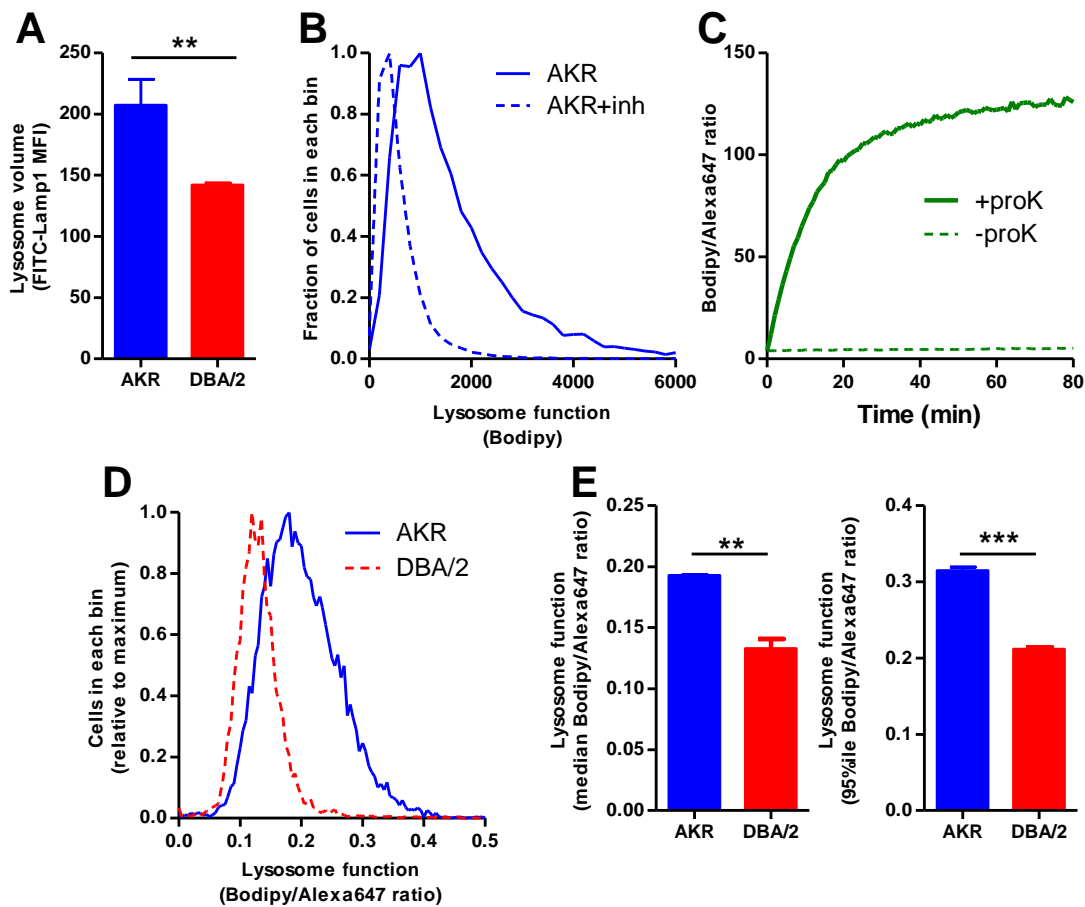

507

508 **Figure 1. Decreased lysosome function in DBA/2J vs. AKR/J macrophages. A.**

509 Lysosome volume assessed by Lamp1 immunofluorescence and flow cytometry

510 (median fluorescence intensity; n=3 per strain, AKR blue bars; DBA/2 red bars). **B.**

511 Lysosome function in AKR BMDM assessed by incubation with DQ-ovalbumin and flow

512 cytometry (solid line). Lysosome inhibition with E64d plus pepstatin A shows a leftward

513 shift (dashed line) indicating decreased lysosome function. **C.** In vitro validation of A-

514 DQ-ova reagent showing proteinase K increases Bodipy/Alexa647 fluorescence ratio.

515 **D.** Typical lysosome function assay in AKR (solid blue line) and DBA/2 (dashed red

516 line) BMDM assessed by incubation with A-DQ-ova and flow cytometry. **E.** Analysis of  
517 lysosome function by A-DQ-ova incubation in AKR (blue bars) and DBA/2 (red bars)  
518 using median (left panel) or the 95<sup>th</sup> percentile (right panel) fluorescence intensity ratio  
519 (duplicate assay). \*\*,  $p < 0.01$ ; \*\*\*,  $p < 0.001$  by two-tailed t-test.

520

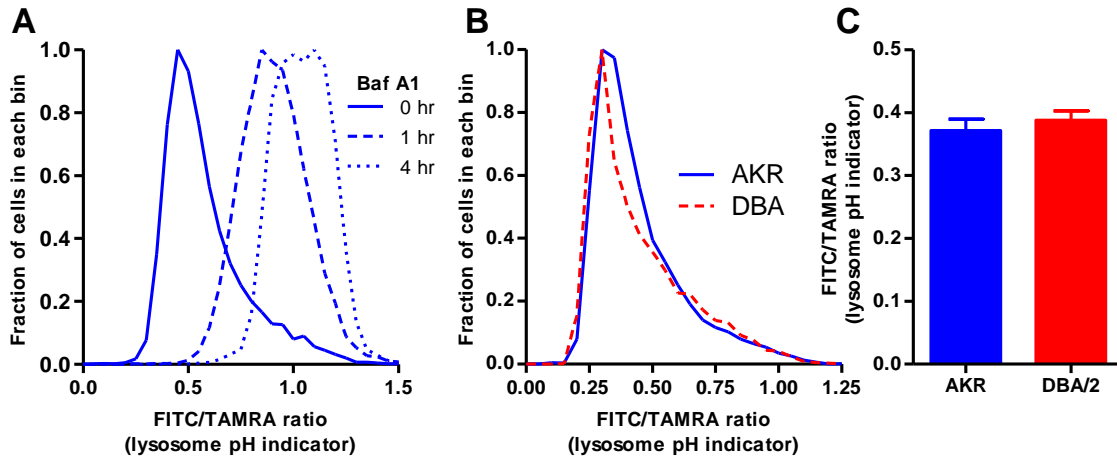

521

522 **Figure 2. Unaltered lysosomal pH in DBA/2J vs. AKR/J macrophages. A.** AKR  
523 macrophages were incubated for 18h with TAMRA-FITC dextran. This was followed by  
524 a 4h equilibration +/- Bafilomycin A1 added for the indicated times before cell harvest.  
525 Cells were analyzed by flow cytometry, demonstrating the usefulness of this probe to  
526 assess lysosomal pH. **B.** Typical lysosomal pH assay in AKR (solid blue line) and  
527 DBA/2 (dashed red line) BMDM assessed by incubation with TAMRA-FITC dextran and  
528 flow cytometry. **C.** Analysis of lysosomal pH in AKR (blue bars) and DBA/2 (red bars)  
529 using median fluorescence intensity ratio (n=3, not significant by two tailed t-test).

530

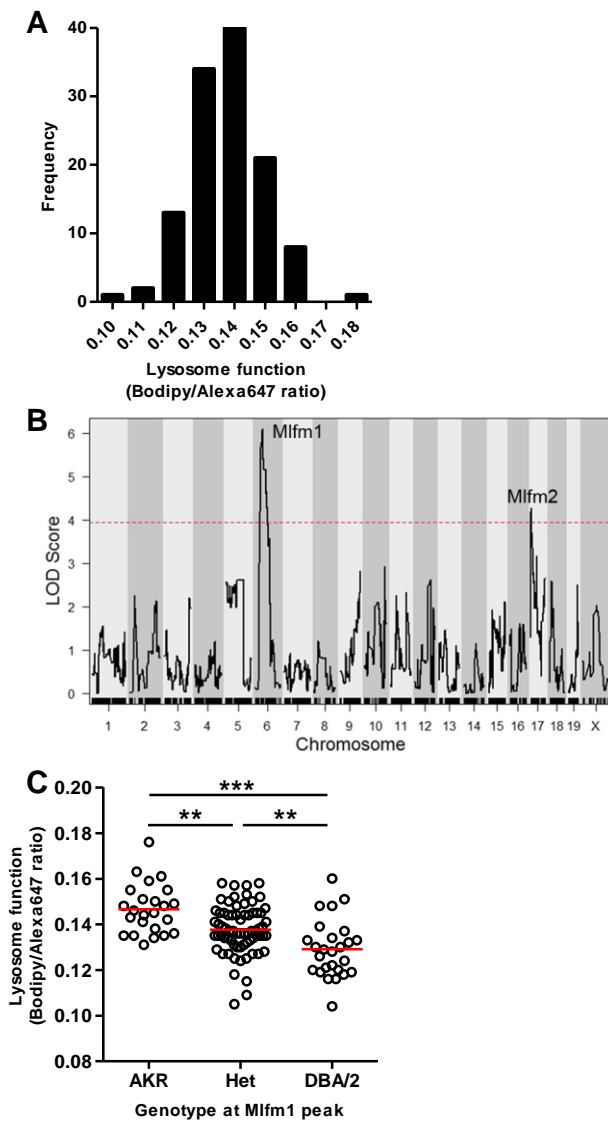

531

532 **Figure 3. QTL analysis for lysosome function.** **A.** Normal distribution of the  
533 Bodipy/Alexa647 fluorescence ratio after F<sub>4</sub> BMDM incubation with A-DQ-ova. **B.** QTL  
534 LOD plot for lysosome function showing *Mlfm1* and *Mlfm2* on chromosomes 6 and 17,  
535 respectively. The dashed red line shows the genome-wide  $p=0.05$  threshold based on  
536 10,000 permutations. **C.** F<sub>4</sub> BMDM lysosome function values by genotype at the *Mlfm1*  
537 peak marker (mean values (red lines); ANOVA linear trend test  $r^2=0.208$ ,  $p<0.0001$ ; \*\*,  
538  $p<0.01$ , and \*\*\*,  $p<0.001$  by ANOVA Tukey posttest).

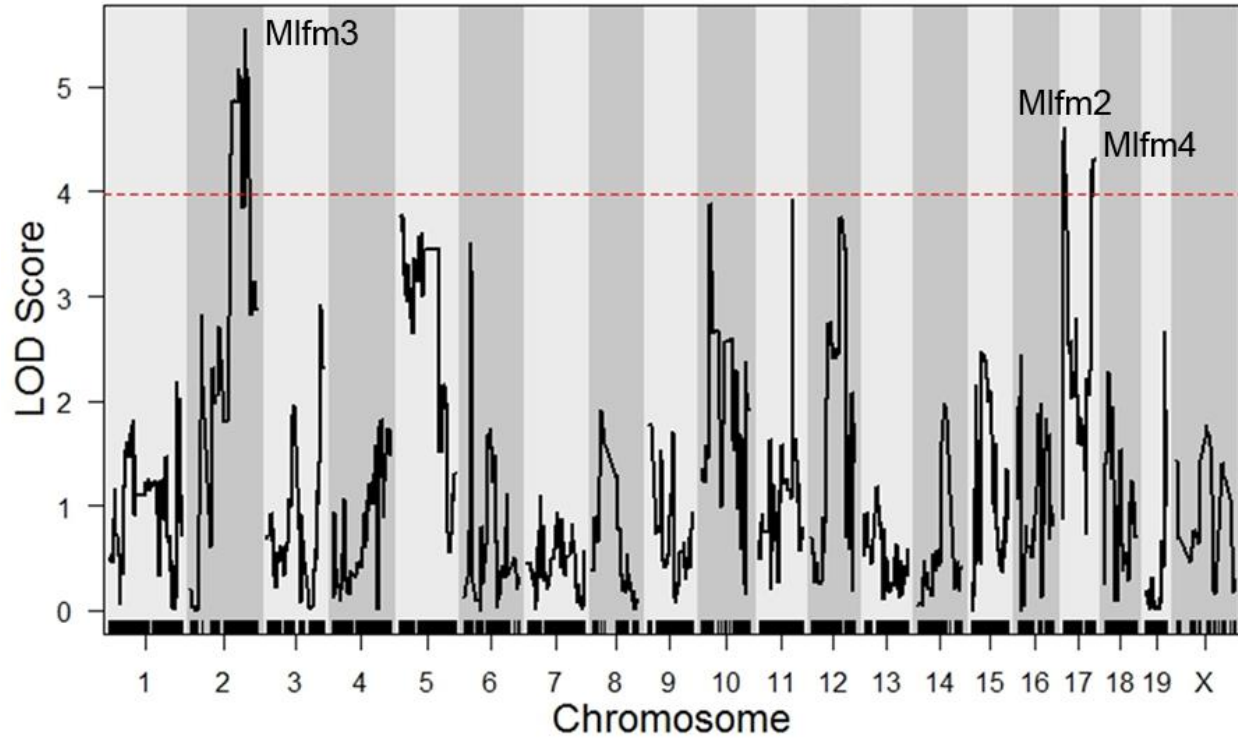

539

540 **Figure 4. . QTL analysis for lysosome function after adjusting for *Mlfm1* as an**  
541 **additive co-variate.** The dashed red line shows the genome-wide  $p=0.05$  threshold  
542 based on 10,000 permutations.

543

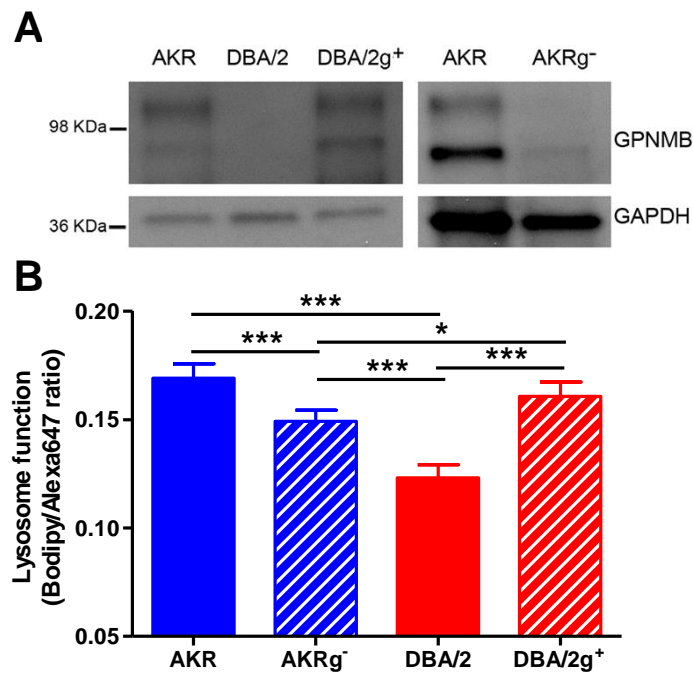

544

545 **Figure 5. Altered lysosome function dependent upon *Gpnmb* expression. A.**

546 GPNMB and GAPDH western blot from lysates of AKR, DBA/2, and DBA/2g<sup>+</sup> BMDM

547 (left panel); and from AKR BMDM transfected with control or *Gpnmb* siRNA (right

548 panel). **B.** Analysis of lysosome function by A-DQ-ova incubation in BMDM from AKR

549 control siRNA (solid blue bars), AKRg<sup>-</sup> (striped blue bars), DBA/2 (solid red bars), and

550 DBA/2g<sup>+</sup> (striped red bars) using median fluorescence intensity ratio (n=5; \*, p<0.05; \*\*\*,

551 p<0.001 by ANOVA with Tukey posttest).

552

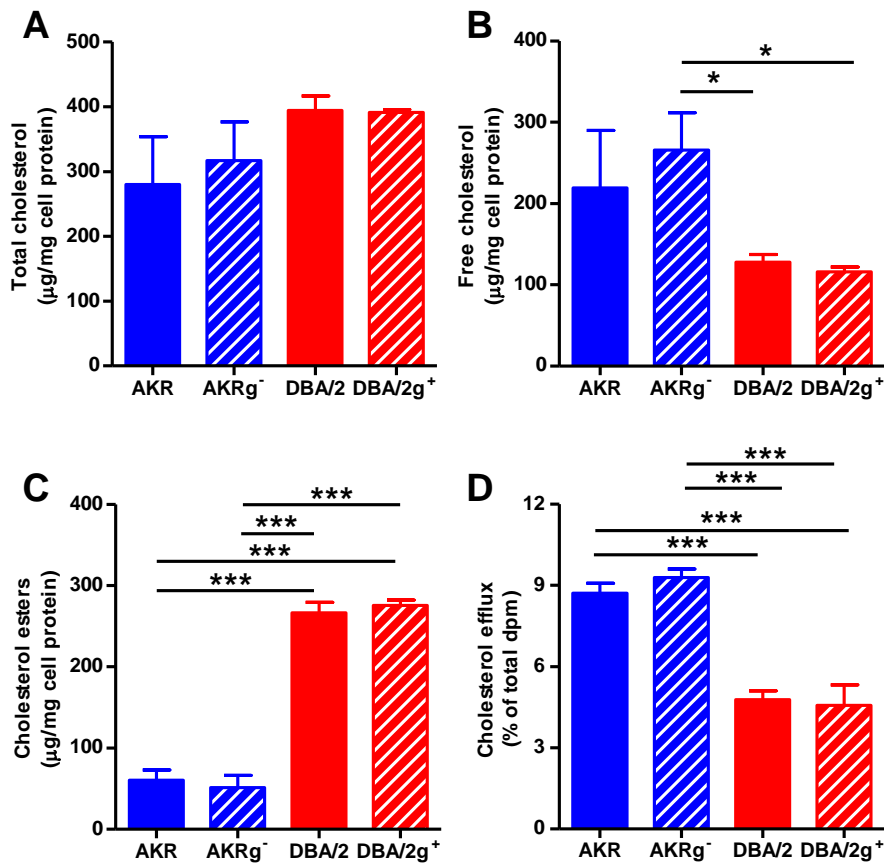

553

554 **Figure 6. Cholesterol loading and efflux independent of *Gpnmb* expression. A-C.**

555 Total cholesterol level (A), free cholesterol (B) and cholesterol esters (C) normalized to

556 protein levels in AcLDL loaded BMDM from AKR control siRNA (solid blue bars), AKRg<sup>-</sup>

557 (striped blue bars), DBA/2 (solid red bars), and DBA/2g<sup>+</sup> (striped red bars) (n=3; \*,

558 p<0.05; \*\*\*, p<0.001 by ANOVA with Tukey posttest). D. Efflux of cholesterol to lipid-

559 free apolipoprotein A1 from AcLDL loaded BMDM from AKR control siRNA (solid blue

560 bars), AKRg<sup>-</sup> (striped blue bars), DBA/2 (solid red bars), and DBA/2g<sup>+</sup> (striped red bars)

561 (n= 3; \*\*\*, p<0.001 by ANOVA with Tukey posttest).
